# Supplementary material
Source: PubMed Central journal article supplement (PMC2518246)
Supplement: tpc.107.057851_1.pdf [file tpc.107.057851_1.pdf]

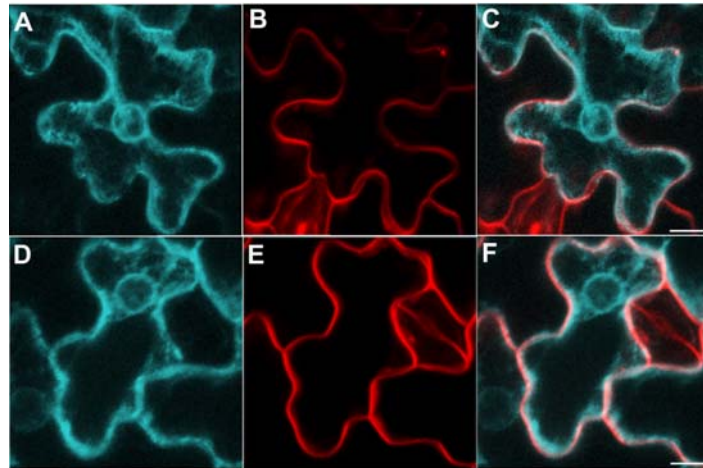

**Supplemental Figure 1.** Comparison of the ER localization of SBH1-CFP and SBH2-CFP versus a plasma membrane marker dye. Leaves of tobacco transiently expressing SBH1-CFP or SBH2-CFP were used for co-localization studies with the plasma membrane marker dye FM4-64. The micrographs presented here show a different localization pattern for SBH1-CFP and SBH2-CFP relative to FM4-64. All images were projection of ten $\times$ 0.67  $\mu$ m optical sections of either CFP or FM4-64 fluorescence through transformed leaf epidermal cells. Bar = 10  $\mu$ m. (A) SBH1-CFP. (B) FM4-64 staining of the plasma membrane of the cell in (A). (C) Merge of A and B. (D) SBH2-CFP. (E) FM4-64 staining of the cell in (D). (F) Merge of D and E.

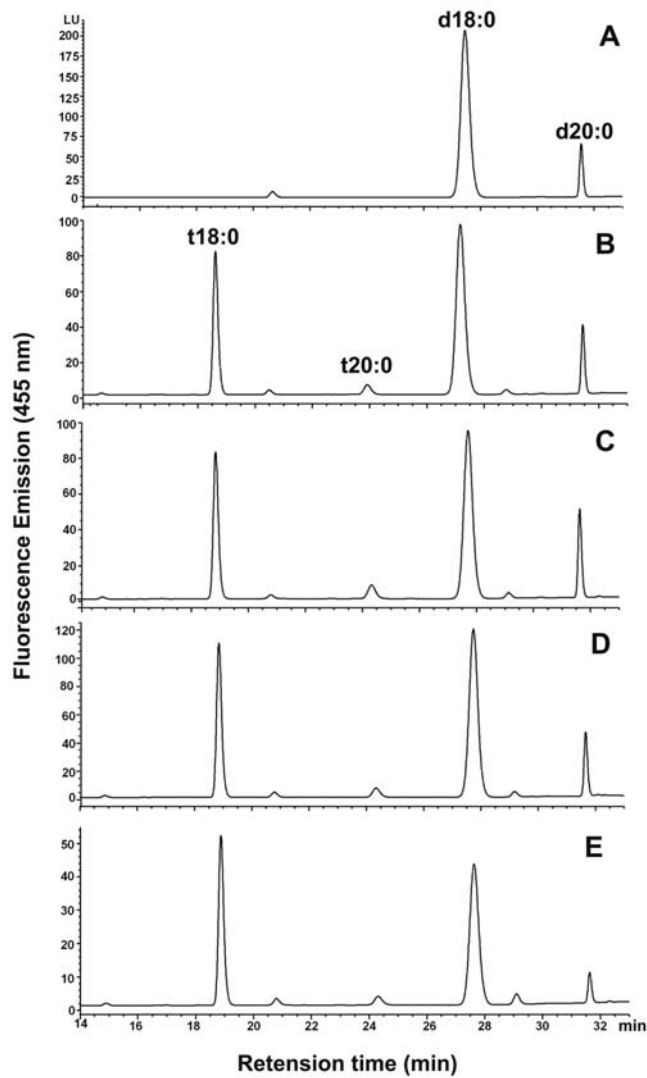

**Supplemental Figure 2.** LCB C-4 hydroxylase activity of fluorescent protein fusions of SBH1 and SBH2. The activity of N- or C-terminal fusions of SBH1 or SBH2 with YFP or CFP in the *S. cerevisiae sur2Δ* mutant was examined. As shown, both N- and C-terminal fusion proteins were able to restore C-4 LCB hydroxylation ability to the *sur2Δ* mutant as indicated by the production of C18- and C20-tri-hydroxy LCBs in *sur2Δ* cells upon galactose induction of fusion protein expression. (A) Yeast *sur2Δ* transformed with the empty vector pYES2. (B) Yeast *sur2Δ* expressing SBH1-CFP (C'-fusion). (C) Yeast *sur2Δ* expressing SBH2-CFP (C'-fusion). (D) Yeast *sur2Δ* expressing YFP-SBH1 (N'-fusion). (E) Yeast *sur2Δ* expressing YFP-SBH2 (N'- fusion).

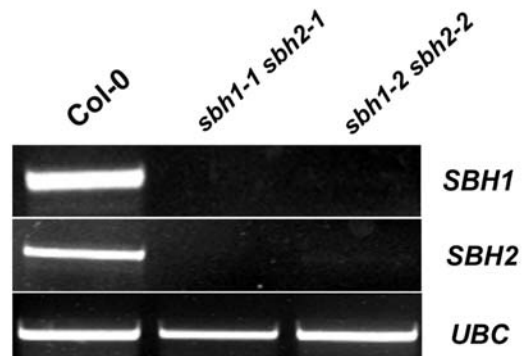

**Supplemental Figure 3.** Expression analysis of *SBH1* and *SBH2* in *sbh1 sbh2* double mutants. RT-PCR analyses using gene specific primers show that the T-DNA double mutants *sbh1-1 sbh2-1* and *sbh1-2 sbh2-2* are null mutants for both *SBH1* and *SBH2*. An ubiquitin-conjugating enzyme gene (*UBC*, At5g25760) was used as a positive control. Shown are representative results from three independent analyses.

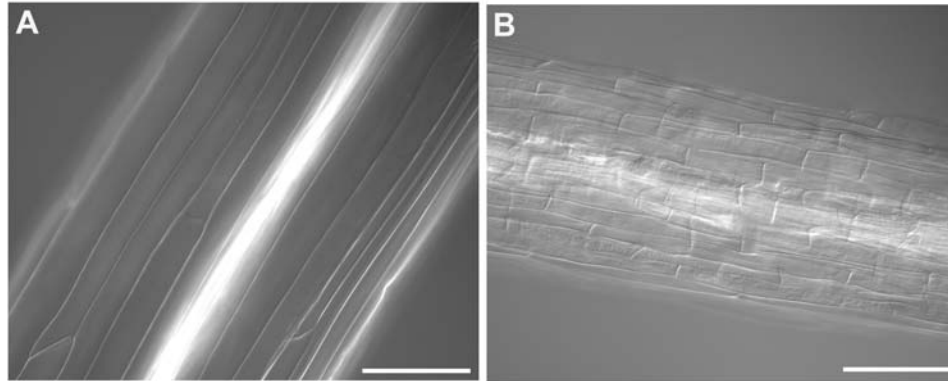

**Supplemental Figure 4.** Epidermal cell length in *Arabidopsis* Col-0 hypocotyls versus that in the *sbh1-1 sbh2-1* double mutant. Epidermal cells from the middle part of hypocotyls of (A) wild-type and (B) *sbh1-1 sbh2-1* plants grown on vertical MS plates in the dark for one week. Images were taken with DIC microscopy. Bar=100  $\mu$ m.

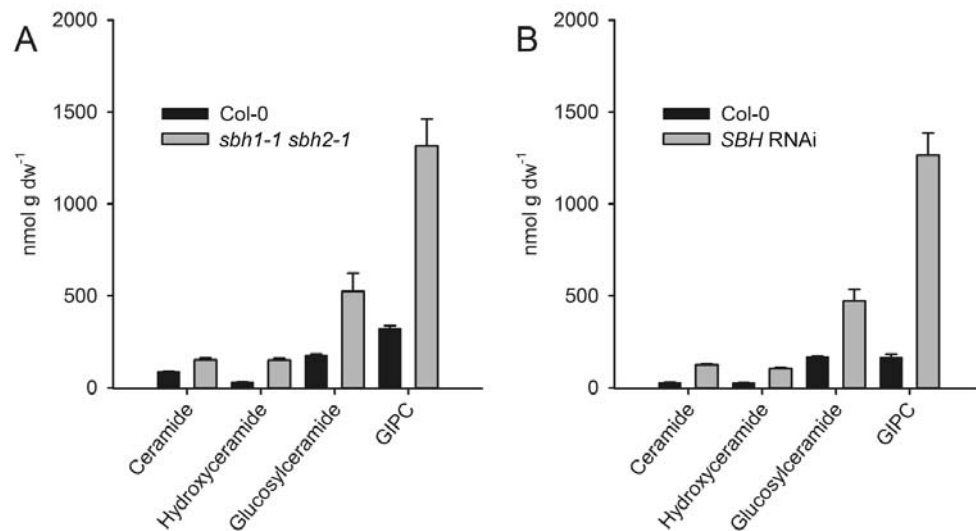

**Supplemental Figure 5.** Content of sphingolipid classes in *sbh1-1 sbh2-1* double mutant and RNAi suppression lines. Total amounts of each sphingolipid class detected by LC-MS/MS profiling of wild-type Col-0 control plants (*Col-0*), *sbh1-1 sbh2-1* double mutant (*sbh1-1 sbh2-1*), and a C-4 LCB hydroxylase RNAi line with approximately 20% tri-hydroxy LCBs in total sphingolipid extract (*SBH RNAi*). Panel (A) shows the sum of the data for each class shown in Figure 9, and Panel B shows the sum of the data for each class in Figure 10. Bars represent the mean (n=3) and error bars show one standard deviation.

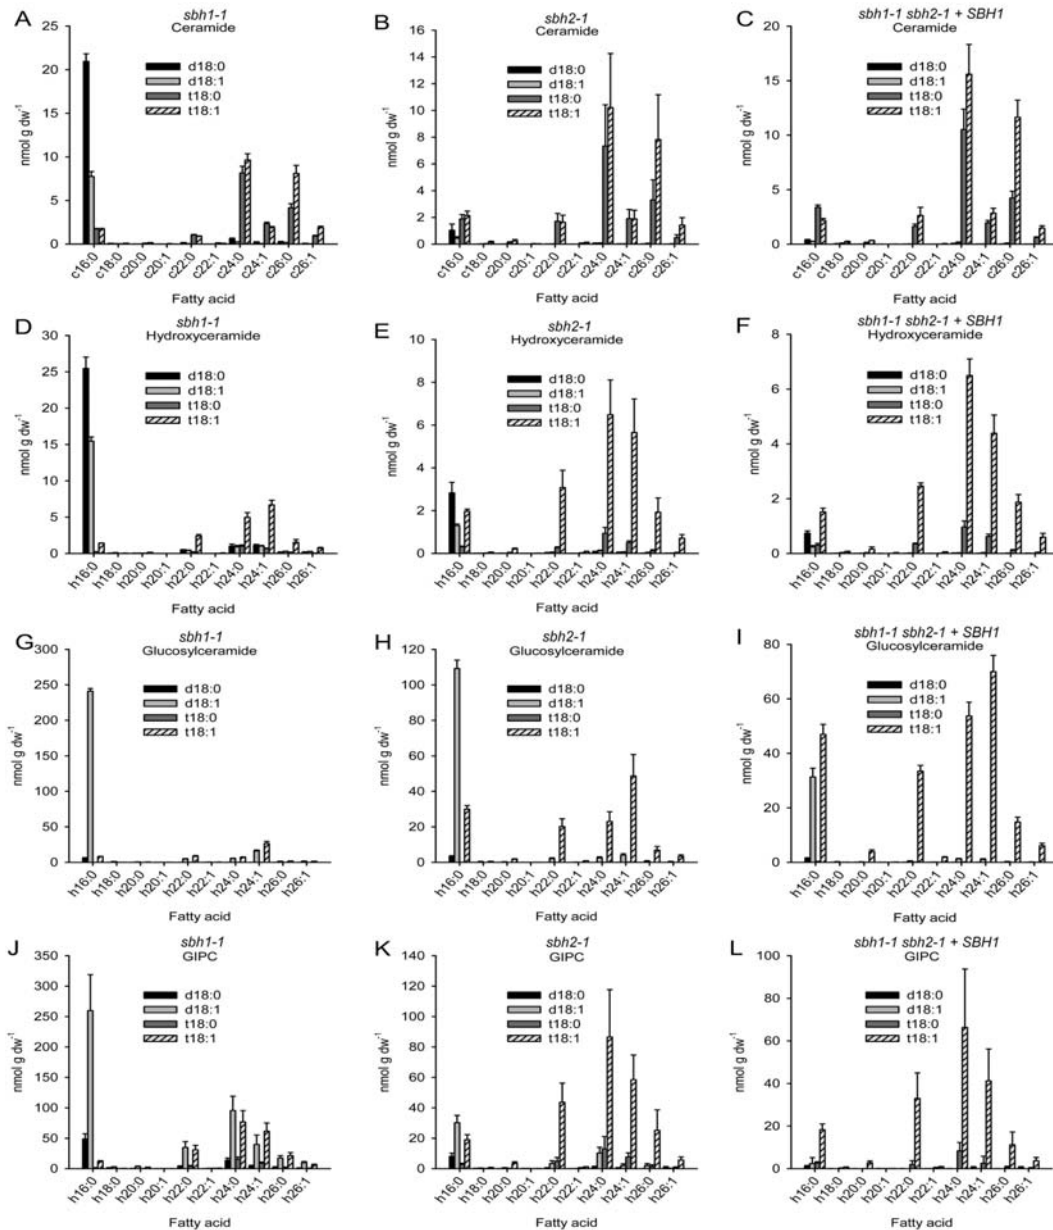

**Supplemental Figure 6.** Spingolipid composition of leaves from *sbh1-1*, *sbh2-1* and the *SBH1*-complemented *sbh1-1 sbh2-1* double mutant. Panels show ESI-MS/MS measurements of the spingolipid composition and content of *sbh1-1* (A, D, G and J), *sbh2-1* (B, E, H and K) and the complemented double mutant *sbh1-1/sbh2-1+SBH1* (C, F, I and L). Each panel shows measurements of individual molecular species for different spingolipid classes as follows: (A-C) ceramides, (D-F) hydroxyceramides, (G-I) glucosylceramides, and (J-L) GIPCs (n=3 ± SD).

**Supplemental Table 1.** Oligonucleotide primer sequences used for confirmation of T-DNA insertion sites of *SBH1* and *SBH2* mutants.

| Primer                      | Oligonucleotide Sequence                 |
|-----------------------------|------------------------------------------|
| LBa1*                       | 5'- TGGTTCACGTAGTGGGCCATCG-3'            |
| LB1*                        | 5'-GCCTTTTCAGAAATGGATAAATAGCCTTGCTTCC-3' |
| SALK 090881 LP <sup>†</sup> | 5'-TTCTGTGATTTGGCAATAGGG-3'              |
| SALK 090881 RP <sup>§</sup> | 5'-ATCCATTCTCCAACCTCAGG -3'              |
| SAIL 1292E_09 LP            | 5'-ATTTGTCAACTCAACAACGCC-3'              |
| SAIL 1292E_09 RP            | 5'-TCCAGTTCAACAAAAGAACCG-3'              |
| SALK 032139 LP              | 5'- TATAACGGTCTCCCATGCAAG-3'             |
| SALK 032139 RP              | 5'-TTTCTAATCATATTTTACCATTTCG-3'          |
| SALK 047916 LP              | 5'-GCTGCGAGAAGTTGTATTTGG-3'              |
| SALK 047916 RP              | 5'-CCTTTTGTGTCCTGAAGCTG-3'               |
| SALK 024105 LP              | 5'-ACAAGAAGCCCCAAAAGAAAG-3'              |
| SALK 024105 RP              | 5'-TGAATCTCCTGCTTCTTGCTG-3'              |

\*The LBa1 and LB1 oligonucleotides were used for screening of left T-DNA borders of SALK and SAIL mutants, respectively.

<sup>†</sup>LP, left gene-specific primer for genotyping of corresponding SALK or SAIL mutant.

<sup>§</sup>RP, right gene-specific primer for genotyping of corresponding SALK or SAIL mutant.

**Supplemental Table 2.** Oligonucleotide primer sequences used for RT-PCR, complementation, subcellular localizations, promoter-GUS assays, and Northern blot analyses.

| Primer Name | Oligonucleotide Sequence                             | Restriction Site Added |
|-------------|------------------------------------------------------|------------------------|
| P1          | 5'-ATGCGGCGCGCCTGGTTTAGATTAAACCCTGGGTCCC-3'*         | <i>AscI</i>            |
| P2          | 5'-ATGCTAATTAAGGCTTCGCAGTACTGTTTTATTAGTC-3'*         | <i>PacI</i>            |
| P3          | 5'-CACCATGATGATGGGTTTTGCTGTATCGGA-3'                 | None                   |
| P4          | 5'-ATCGTCTTTGAATCTTTAGTCGGGCGAGCT-3'                 | None                   |
| P5          | 5'- TTAATCGTCTTTGAATCTTTAGTC-3'                      | None                   |
| P6          | 5'-CACCATGATGAGTTTCGTGATTCAGATGAATT-3'               | None                   |
| P7          | 5'-CTCATCTTTGGATACTTTGATTGGCCGTGTTT-3'               | None                   |
| P8          | 5'- TTAATCATCTTTGGATACTTTGATT-3'                     | None                   |
| P9          | 5'- AGATTTTGGAGTTTGGATATATGTTATGTATCTGC-3'           | None                   |
| P10         | 5'- AGAATGGCCTCGTAGATGGATAGATTATAAAA -3'             | None                   |
| P11         | 5'- TTTCTCTTTCTTTCTTTTGGGGCTTCTT-3'                  | None                   |
| P12         | 5'- GGTCTCAAACCTGGAATTATAAAGCAGATAA-3'               | None                   |
| P13         | 5'-GCGCGACTGTTTAAAGAATACAAAGAG-3'                    | <i>None</i>            |
| P14         | 5'-TCACCAGATCTTAGAAGATCCCTGAGT-3'                    | <i>None</i>            |
| P15         | 5'-GCCTCGAGAAACATATCCACTCTCAACACCACC-3'*             | <i>XhoI</i>            |
| P16         | 5'-ATGGTACCTTCTCAAGCGAGTAAGGCATGTAA-3'               | <i>KpnI</i>            |
| P17         | 5'-GCTCTAGAAAAACATATCCACTCTCAACACCACC-3'             | <i>XbaI</i>            |
| P18         | 5'-GCAAGCTTTTCTCAAGCGAGTAAGGCATGTAA-3'               | <i>HindIII</i>         |
| P19         | 5'- GCAAGCTTTCTCCGTTCTCTCCTTTCTCTC-3'                | <i>HindIII</i>         |
| P20         | 5'- ACTCTAGACCTAAATCTCAGCTTCTCAGATCCTC-3'            | <i>XbaI</i>            |
| P21         | 5'-GCAAGCTTTTGTGTTCTCCGACTCTAGTCCC-3'                | <i>HindIII</i>         |
| P22         | 5'-ACTCTAGACTCTAATCTAATCAATCTCTCCCC-3'               | <i>XbaI</i>            |
| P23         | 5'- ATGCAAGCTTACCATGGCAATGATGATGGGTTTTGCTGTATCGGA-3' | <i>HindIII</i>         |
| P24         | 5'- ATGCTCTAGATTACTTGTACAGCTCGTCCATGCCGAGA-3'        | <i>XbaI</i>            |
| P25         | 5'- ATGCAAGCTTACCATGGCAATGATGATTTTCGTGATTCAGATGA-3'  | <i>HindIII</i>         |
| P26         | 5'- ATGCAAGCTTACCATGGTGAGCAAGGGCGAGGAGCTGT-3'        | <i>HindIII</i>         |
| P27         | 5'- ATGCTCTAGATTAATCGTCTTTGAATCTTTAGTC-3'            | <i>XbaI</i>            |
| P28         | 5'- ATGCTCTAGATTACTCATCTTTGGATACTTTGATT-3'           | <i>XbaI</i>            |

\*The underlined sequences correspond to introduced restriction enzyme sites.



**Supplemental Table 3.** Oligonucleotides and numbers of PCR cycles used for expression analysis of cell death and HR related genes.

| Oligonucleotide    | Oligonucleotide Sequence           | # of Cycles |
|--------------------|------------------------------------|-------------|
| PR-2(At3g57260)5'  | 5'-AGCCTCACCACCAATGTTGATGAT-3'     | 35 cycles   |
| PR-2(At3g57260)3'  | 5'-GTTCTCGATGTTCTGCATTGCTTGT-3'    |             |
| PRXc(At3g49120)5'  | 5'-CAACATCGTCCACTTGGACAATCTT-3'    | 30 cycles   |
| PRXc(At3g49120)3'  | 5'-CCTGCCAAAGTGACAGATTGTTGAG-3'    |             |
| SAG13(At2g29350)5' | 5'-GAAACTCAGCTTCAAGAACGCTTACGTG-3' | 30 cycles   |
| SAG13(At2g29350)3' | 5'-TCGCCCATTTCGCAAGCTAAGTTT-3'     |             |
| FMO(At1g19250)5'   | 5'-CGTATTTCGAAGCCTCGGATTCAGTC-3'   | 35 cycles   |
| FMO(At1g19250)3'   | 5'-GGTATTCTTGGAACGTCGCCGTATT-3'    |             |
| SAG12(At5g45890)5' | 5'-TTGACTGGAGGAAGAAAGGAGCTGT-3'    | 35 cycles   |
| SAG12(At5g45890)3' | 5'-CTTCAATTCCAACGCTAACCGGT-3'      |             |
| PR-3(At3g12500)5'  | 5'-AACGGTCTATGCTGCAGCGAGTT-3'      | 30 cycles   |
| PR-3(At3g12500)3'  | 5'-GCGCTCGGTTACAGTAGTCTGA-3'       |             |
| ERD11(At1g02930)5' | 5'-ATGGCAGGAATCAAAGTTTTTCGG-3'     | 25 cycles   |
| ERD11(At1g02930)3' | 5'-CCTCTTCTTCTTCAACAACGGTTTTTG-3'  |             |
| UBC( At5g25760)5'  | 5'-ATGCAGGCATCAAGAGCGCGACTGT-3'    | 30 cycles   |
| UBC(At5g25760)3'   | 5'-CACCGCCTTCGTAAGGAGTCTCCGA-3'    |             |
